# Supplementary material for: Molecular Characteristics of Carnivore protoparvovirus 1 with High Sequence Similarity between Wild and Domestic Carnivores in Taiwan
Source: MDPI journal article supplement (doi:10.3390/pathogens10060671), 2021-05-29
Supplement: s1 [file s1]

**Table S1.** Characteristics of each CPPV-1-positive individual of GenBank accession, Sample ID, species, age (Ad = adult, Juv = Juvenile), sex (M = male, F = female), sample type and subtype of virus.

| GenBank Accession | Sample ID   | Species                  | Age            | Sex            | Sample Type                        | Antigenic Types |
|-------------------|-------------|--------------------------|----------------|----------------|------------------------------------|-----------------|
| MN445577          | 2018081501  | Ferret-badger            | Juv            | F              | EDTA                               | CPV-2a          |
| MN445579          | 2017102101  | Ferret-badger            | Ad             | M              | EDTA                               | CPV-2a          |
| MN445580          | 2017100101  | Ferret-badger            | Ad             | M              | EDTA                               | CPV-2a          |
| MN445581          | 2017093002  | Ferret-badger            | Ad             | M              | EDTA                               | CPV-2a          |
| MN445582          | 2017093001  | Ferret-badger            | Ad             | M              | EDTA                               | CPV-2a          |
| MT909128          | C2015102101 | Formosan gem-faced civet | U <sup>1</sup> | U <sup>1</sup> | Small intestine                    | CPV-2a          |
| MT909129          | C2017092701 | Ferret-badger            | Ad             | F              | Spleen                             | CPV-2a          |
| MT909130          | C2017100901 | Ferret-badger            | Juv            | M              | Spleen                             | CPV-2a          |
| MT909131          | C2017102201 | Ferret-badger            | Ad             | M              | Small intestine                    | CPV-2a          |
| MT909132          | C2018020801 | Ferret-badger            | Ad             | M              | Small intestine                    | CPV-2a          |
| MT909134          | C2018060601 | Formosan gem-faced civet | Ad             | M              | Anal swab, small intestine, spleen | CPV-2a          |
| MT909135          | C2018100101 | Formosan gem-faced civet | Ad             | F              | Anal swab, small intestine, spleen | CPV-2a          |
| MT909133          | C2018051401 | Formosan gem-faced civet | Ad             | M              | Anal swab, small intestine, spleen | CPV-2a          |
| MT909136          | C2018100102 | Formosan gem-faced civet | Ad             | F              | Small intestine, spleen            | CPV-2a          |
| MT909143          | C2017050902 | Ferret-badger            | Ad             | M              | Anal swab                          | CPV-2a          |
| MT909138          | C2018060602 | Formosan gem-faced civet | Ad             | M              | Anal swab, small intestine, spleen | CPV-2b          |
| MN445578          | 2018060101  | Ferret-badger            | Ad             | F              | Anal swab                          | CPV-2c          |
| MN445583          | 2017041601  | Crab-Eating Mongoose     | Ad             | M              | Anal swab                          | CPV-2c          |
| MN445584          | 2017041401  | Formosan gem-faced civet | U <sup>1</sup> | U <sup>1</sup> | EDTA, Anal swab                    | CPV-2c          |
| MT909139          | C2016021701 | Formosan gem-faced civet | U <sup>1</sup> | U <sup>1</sup> | Small intestine, spleen            | CPV-2c          |
| MT909140          | C2017032601 | Ferret-badger            | U <sup>1</sup> | F              | Anal swab                          | CPV-2c          |
| MT909141          | C2017041501 | Formosan gem-faced civet | Ad             | F              | Anal swab, small intestine, spleen | CPV-2c          |
| MT909142          | C2017041701 | Ferret-badger            | Ad             | F              | Anal swab                          | CPV-2c          |
| MT909144          | C2018051401 | Formosan gem-faced civet | Ad             | M              | Anal swab, small intestine, spleen | CPV-2c          |
| MT909146          | C2019041801 | Formosan gem-faced civet | Juv            | M              | Small intestine, spleen            | CPV-2c          |
| MT909147          | C2018070401 | Formosan gem-faced civet | Ad             | F              | Small intestine, spleen            | CPV-2c          |
| MT909148          | C2019102201 | Ferret-badger            | Ad             | F              | Anal swab                          | CPV-2c          |
| MN445587          | 2016010101  | Crab-Eating Mongoose     | Juv            | F              | EDTA                               | CPV-2c          |
| MT909145          | C2016012701 | Crab-Eating Mongoose     | Ad             | U1             | Anal swab, small intestine         | CPV-2c          |
| MT909127          | C2017061201 | Formosan gem-faced civet | Ad             | M              | Spleen                             | FPV             |
| MN445586          | 2016122101  | Crab-Eating Mongoose     | Juv            | F              | Anal swab                          | FPV             |
| MN445588          | 2015120101  | Crab-Eating Mongoose     | Juv            | M              | Anal swab                          | FPV             |
| MN445589          | 2015021102  | Ferret-badger            | Ad             | M              | Anal swab                          | FPV             |

<sup>1</sup>U = unknown.
